# Supplementary material for: Deciphering the differentiations of traditional Chinese medicine analogous formulae by parallel liquid chromatography-mass spectrometry coupled with microplate-based assays
Source: Royal Society of Chemistry journal article supplement (doi:10.1039/c4ay01972e), 2014-10-14
Supplement: c4ay01972e1.pdf [file c4ay01972e1.pdf]

*Supporting Information for:*

**Deciphering the differentiations of Traditional Chinese Medicine  
analogous formulae by parallel liquid chromatography-mass  
spectrometry coupled with microplate-based assays**

*Shun Xiao, Cui Hao, Ni Ai, Kedi Luo, Xuexun Wen, Shufang Wang, Xiaohui Fan\**

*Pharmaceutical Informatics Institute, College of Pharmaceutical Sciences, Zhejiang  
University, Hangzhou 310058, China.*

*\*Correspondence should be addressed to Dr. Xiaohui Fan ([fanxh@zju.edu.cn](mailto:fanxh@zju.edu.cn)),*

*Phone: +86-571-88208596. Fax: +86-571-88208426.*

**Table.S1** Detailed MS data of WLS.

| RT<br>(min) | MS Neg                                                                                                            | MS Pos                                                                                                                                                                                                | MS <sup>2</sup> Neg                                       | MS <sup>2</sup> Pos | MS <sup>3</sup> Neg                                                                                                            | MS <sup>3</sup> Pos | MW<br>(HR-MS) | Formula                                                       | Error<br>(ppm) |
|-------------|-------------------------------------------------------------------------------------------------------------------|-------------------------------------------------------------------------------------------------------------------------------------------------------------------------------------------------------|-----------------------------------------------------------|---------------------|--------------------------------------------------------------------------------------------------------------------------------|---------------------|---------------|---------------------------------------------------------------|----------------|
| 10.99       | MS[Full ms]1440.93(203),<br>1367.25(212), 1126.54(216),<br>962.48(223), 726.07(214),<br>326.31(513), 287.26(1000) |                                                                                                                                                                                                       | MS2[287.30@35]: 241.17(1000)                              |                     | MS3[287.30@35-->241.20@35]:<br>198.00(207), 196.98(93),<br>179.87(59), 167.84(98),<br>151.02(546), 126.32(95),<br>125.22(1000) |                     | 242.0830      | C <sub>10</sub> H <sub>14</sub> O <sub>5</sub> N <sub>2</sub> | 2.1            |
| 11.10       | MS[Full ms]1308.25(214),<br>1185.58(295), 914.98(261),<br>650.23(249), 326.30(1000)                               | MS[Full ms]491.96(107),<br>329.40(148), 328.35(1000),<br>317.12(104), 310.48(194),<br>302.43(124), 297.04(107),<br>212.92(106), 194.41(130),<br>167.17(146), 158.21(498),<br>122.56(237), 110.94(231) | MS2[326.30@35]: 278.15(438),<br>236.07(1000), 164.27(250) |                     | MS3[326.30@35-->236.10@40]:<br>164.25(1000), 163.35(19)                                                                        |                     | 327.1245      | C <sub>15</sub> H <sub>21</sub> O <sub>7</sub> N              | 0.5            |
| 18.47       | MS[Full ms]787.12(102),<br>494.42(264), 493.42(1000)                                                              | MS[Full ms]981.16(174),<br>919.18(263), 692.60(156),<br>534.29(124), 533.35(369),<br>471.39(140), 468.51(330),<br>467.43(192), 466.32(1000),<br>285.43(110), 264.92(144),<br>251.30(162), 122.43(104) | MS2[493.40@35]: 447.30(1000)                              |                     | MS3[493.40@35-->447.30@40]:<br>411.23(38), 285.24(1000),<br>267.31(24), 249.33(131),<br>179.06(54), 173.29(68),<br>160.82(37)  |                     | 448.2291      | C <sub>21</sub> H <sub>36</sub> O <sub>10</sub>               | 0.3            |

| RT<br>(min) | MS Neg                                                                                                                                                                                                       | MS Pos                                                                                                                                                                                                 | MS <sup>2</sup> Neg                                                      | MS <sup>2</sup> Pos                                                                                              | MS <sup>3</sup> Neg | MS <sup>3</sup> Pos                                                                                                                                                                  | MW<br>(HR-MS) | Formula                                          | Error<br>(ppm) |
|-------------|--------------------------------------------------------------------------------------------------------------------------------------------------------------------------------------------------------------|--------------------------------------------------------------------------------------------------------------------------------------------------------------------------------------------------------|--------------------------------------------------------------------------|------------------------------------------------------------------------------------------------------------------|---------------------|--------------------------------------------------------------------------------------------------------------------------------------------------------------------------------------|---------------|--------------------------------------------------|----------------|
| 20.23       | MS[Full ms]1261.04(118),<br>1165.86(105), 1078.82(117),<br>1013.82(101), 797.16(107),<br>762.52(117), 756.85(111),<br>740.22(129), 699.11(126),<br>563.09(107), 478.99(236),<br>350.42(173), 349.42(1000)    |                                                                                                                                                                                                        | MS2[349.45@35]: 350.32(111),<br>349.33(1000), 320.87(32),<br>241.32(214) |                                                                                                                  |                     |                                                                                                                                                                                      | 350.0599      | C <sub>13</sub> H <sub>18</sub> O <sub>6</sub> S | 1.5            |
| 20.74       |                                                                                                                                                                                                              | MS[Full ms]427.42(194),<br>293.32(184), 266.33(181),<br>265.30(1000), 177.24(192),<br>167.04(137), 122.61(224),<br>111.07(111)                                                                         |                                                                          | MS2[265.30@35]: 265.25(105),<br>248.20(1000), 206.32(119),<br>177.17(939), 120.22(51),<br>115.15(59), 114.14(57) |                     | MS3[265.30@35-->206.30@40]:<br>206.99(122), 206.22(1000),<br>192.19(92), 191.14(449),<br>162.89(14), 160.53(22),<br>159.29(11), 147.08(11),<br>134.18(20), 107.47(52),<br>105.09(17) | 247.1547      | C <sub>14</sub> H <sub>17</sub> O <sub>3</sub> N | 3.5            |
| 21.54       | MS[Full ms]1479.08(297),<br>1430.46(257), 1395.16(371),<br>1291.07(335), 1271.18(273),<br>1205.13(268), 1172.00(261),<br>974.85(264), 846.56(266),<br>845.72(251), 844.94(621),<br>799.48(263), 137.43(1000) | MS[Full ms]823.10(340),<br>802.33(318), 801.29(750),<br>495.52(286), 441.71(263),<br>427.26(405), 411.41(279),<br>323.11(281), 297.01(417),<br>273.85(255), 251.17(329),<br>166.95(291), 122.48(1000), |                                                                          |                                                                                                                  |                     |                                                                                                                                                                                      | 800.2455      | C <sub>39</sub> H <sub>44</sub> O <sub>18</sub>  | 0.5            |

| RT<br>(min) | MS Neg                                                                                                                                            | MS Pos                                                                                                                                      | MS <sup>2</sup> Neg                                                                                             | MS <sup>2</sup> Pos                                                                                                                                                                      | MS <sup>3</sup> Neg                                                   | MS <sup>3</sup> Pos                                                                                                                                                       | MW<br>(HR-MS) | Formula                                          | Error<br>(ppm) |
|-------------|---------------------------------------------------------------------------------------------------------------------------------------------------|---------------------------------------------------------------------------------------------------------------------------------------------|-----------------------------------------------------------------------------------------------------------------|------------------------------------------------------------------------------------------------------------------------------------------------------------------------------------------|-----------------------------------------------------------------------|---------------------------------------------------------------------------------------------------------------------------------------------------------------------------|---------------|--------------------------------------------------|----------------|
|             |                                                                                                                                                   | 110.91(531)                                                                                                                                 |                                                                                                                 |                                                                                                                                                                                          |                                                                       |                                                                                                                                                                           |               |                                                  |                |
| 23.47       |                                                                                                                                                   | MS[Full ms]441.45(335),<br>424.36(212), 315.56(293),<br>314.50(1000), 296.98(205),<br>217.29(311), 208.11(206),<br>167.02(265), 122.51(508) |                                                                                                                 | MS2[314.50@35]: 315.30(72),<br>314.29(222), 299.31(125),<br>272.08(81), 271.13(497),<br>270.21(161), 269.18(1000),<br>237.28(97), 175.21(148),<br>145.20(90), 137.23(59),<br>107.17(114) |                                                                       | MS3[314.50@35-->269.20@40]:<br>238.18(82), 237.12(564),<br>209.13(236), 176.12(66),<br>175.13(1000), 163.11(58),<br>145.13(500), 143.02(154),<br>137.11(361), 107.13(804) | 313.1751      | C <sub>19</sub> H <sub>23</sub> O <sub>3</sub> N | 4.9            |
| 26.21       | MS[Full ms]1268.73(478),<br>1159.81(575), 1112.62(418),<br>1098.51(570), 1090.34(510),<br>1049.35(518), 826.92(439),<br>447.15(1000)              |                                                                                                                                             | MS2[447.20@35]: 401.20(1000)                                                                                    |                                                                                                                                                                                          | MS3[447.20@35-->401.20@40]:<br>269.13(1000), 161.08(277)              |                                                                                                                                                                           | 402.1508      | C <sub>18</sub> H <sub>26</sub> O <sub>10</sub>  | -0.4           |
| 27.99       | MS[Full ms]1230.80(308),<br>1193.85(349), 1110.71(422),<br>1036.94(390), 1021.29(347),<br>1004.02(304), 966.89(326),<br>545.03(509), 415.39(1000) |                                                                                                                                             | MS2[415.40@35]: 415.32(245),<br>387.32(54), 369.18(72),<br>270.14(53), 269.17(1000),<br>268.47(70), 161.10(357) |                                                                                                                                                                                          | MS3[415.40@35-->269.20@40]:<br>161.05(1000), 101.37(55),<br>89.25(77) |                                                                                                                                                                           | 416.1246      | C <sub>18</sub> H <sub>24</sub> O <sub>11</sub>  | 0.3            |

| RT<br>(min) | MS Neg | MS Pos                                                                                                                                                      | MS <sup>2</sup> Neg | MS <sup>2</sup> Pos                                                                                   | MS <sup>3</sup> Neg | MS <sup>3</sup> Pos                                                                                                                                                                                    | MW<br>(HR-MS) | Formula                                          | Error<br>(ppm) |
|-------------|--------|-------------------------------------------------------------------------------------------------------------------------------------------------------------|---------------------|-------------------------------------------------------------------------------------------------------|---------------------|--------------------------------------------------------------------------------------------------------------------------------------------------------------------------------------------------------|---------------|--------------------------------------------------|----------------|
| 28.03       |        | MS[Full ms]903.46(102),<br>403.43(101), 329.59(186),<br>328.50(1000), 298.36(107),<br>297.57(183), 296.87(199),<br>166.92(128), 122.53(409),<br>110.94(103) |                     | MS2[328.50@35]: 298.17(185),<br>297.15(1000), 265.25(202)                                             |                     | MS3[328.50@35-->297.20@40]:<br>283.17(28), 282.14(194),<br>266.15(165), 265.16(1000),<br>255.02(24), 237.22(50)                                                                                        | 327.1543      | C <sub>19</sub> H <sub>21</sub> O <sub>4</sub> N | 4.2            |
| 29.06       |        | MS[Full ms]343.53(246),<br>342.43(1000), 297.29(171),<br>167.03(141), 122.54(232)                                                                           |                     | MS2[342.50@35]: 311.16(155),<br>299.21(156), 298.21(165),<br>297.17(1000), 279.25(76),<br>265.27(237) |                     | MS3[342.50@35-->297.20@40]:<br>283.09(27), 282.14(192),<br>266.17(145), 265.14(1000),<br>255.09(24), 237.21(57)                                                                                        | 341.1700      | C <sub>20</sub> H <sub>23</sub> O <sub>4</sub> N | 4.4            |
| 30.99       |        | MS[Full ms]331.50(268),<br>330.48(1000), 167.08(214),<br>122.54(572)                                                                                        |                     | MS2[330.50@35]: 299.12(67),<br>193.29(96), 192.26(1000)                                               |                     | MS3[330.50@35-->299.10@40]:<br>270.03(82), 267.11(551),<br>253.33(65), 249.28(103),<br>239.19(192), 235.19(274),<br>207.18(61), 176.17(137),<br>175.08(1000), 144.27(117),<br>143.19(544), 137.20(535) | 329.1700      | C <sub>19</sub> H <sub>23</sub> O <sub>4</sub> N | 4.0            |

| RT<br>(min) | MS Neg                                                                                                                                                                          | MS Pos                                                                                                                                      | MS <sup>2</sup> Neg                                                                                                                                          | MS <sup>2</sup> Pos | MS <sup>3</sup> Neg                                                      | MS <sup>3</sup> Pos | MW<br>(HR-MS) | Formula                                          | Error<br>(ppm) |
|-------------|---------------------------------------------------------------------------------------------------------------------------------------------------------------------------------|---------------------------------------------------------------------------------------------------------------------------------------------|--------------------------------------------------------------------------------------------------------------------------------------------------------------|---------------------|--------------------------------------------------------------------------|---------------------|---------------|--------------------------------------------------|----------------|
| 31.56       | MS[Full ms]1426.73(272),<br>1301.88(315), 1276.91(257),<br>1268.42(261), 1253.96(329),<br>1205.29(345), 1110.59(319),<br>809.22(255), 803.24(258),<br>754.38(251), 563.47(1000) | MS[Full ms]566.50(477),<br>565.44(728), 359.06(446),<br>297.04(593), 237.39(430),<br>207.99(545), 167.04(602),<br>122.49(1000), 110.99(521) | MS2[563.50@35]: 545.29(87),<br>503.34(64), 485.31(64),<br>474.30(172), 473.30(648),<br>444.34(220), 443.36(1000),<br>383.37(221), 354.43(57),<br>353.37(336) |                     | MS3[563.50@35-->443.40@40]:<br>383.29(213), 354.30(185),<br>353.27(1000) |                     | 564.1406      | C <sub>26</sub> H <sub>28</sub> O <sub>14</sub>  | -0.1           |
| 34.29       | MS[Full ms]1431.93(538),<br>1344.38(320), 1216.21(432),<br>1147.30(351), 1060.90(359),<br>989.61(348), 702.84(349),<br>627.22(1000), 581.37(327),<br>475.35(408)                | MS[Full ms]667.14(390),<br>601.27(496), 600.19(1000),<br>453.70(810), 352.28(521),<br>167.05(334), 122.52(684),<br>110.92(361)              | MS2[581.40@35]: 566.20(93),<br>419.30(1000), 405.42(65),<br>404.31(114), 401.31(109),<br>233.20(92)                                                          |                     | MS3[581.40@35-->419.30@40]:<br>404.21(1000), 389.30(91),<br>373.33(237)  |                     | 582.2240      | C <sub>28</sub> H <sub>38</sub> O <sub>13</sub>  | 0.9            |
| 35.08       | MS[Full ms]1391.58(384),<br>1326.45(415), 1313.66(428),<br>1284.16(432), 1177.21(421),<br>1036.39(358), 912.85(357),<br>787.65(364), 473.15(509),<br>431.31(470), 301.45(1000)  |                                                                                                                                             | MS2[301.50@40]: 302.44(67),<br>301.39(1000), 283.19(132),<br>273.00(220), 257.18(116),<br>255.47(60), 243.59(64),<br>219.14(53), 181.33(51)                  |                     | MS3[301.50@40-->273.00@45]:<br>272.95(1000)                              |                     | 302.1479      | C <sub>15</sub> H <sub>26</sub> O <sub>4</sub> S | 2.3            |

| RT<br>(min) | MS Neg                                                                                                                                                                         | MS Pos                                                                                                         | MS <sup>2</sup> Neg                                      | MS <sup>2</sup> Pos                                                                                                                                                                                                                                                                     | MS <sup>3</sup> Neg                                                                                | MS <sup>3</sup> Pos                                                                                                                                                  | MW<br>(HR-MS) | Formula                                          | Error<br>(ppm) |
|-------------|--------------------------------------------------------------------------------------------------------------------------------------------------------------------------------|----------------------------------------------------------------------------------------------------------------|----------------------------------------------------------|-----------------------------------------------------------------------------------------------------------------------------------------------------------------------------------------------------------------------------------------------------------------------------------------|----------------------------------------------------------------------------------------------------|----------------------------------------------------------------------------------------------------------------------------------------------------------------------|---------------|--------------------------------------------------|----------------|
| 38.40       |                                                                                                                                                                                | MS[Full ms]505.41(234),<br>440.49(208), 438.13(366),<br>292.06(323), 267.21(469),<br>249.35(1000), 122.43(266) |                                                          | MS2[249.40@35]: 249.15(71),<br>232.20(57), 231.19(403),<br>221.17(436), 219.21(80),<br>217.07(53), 216.11(62),<br>204.23(287), 199.20(99),<br>190.09(84), 189.13(574),<br>188.11(138), 187.11(1000),<br>173.09(56), 171.26(74),<br>161.27(164), 159.19(515),<br>157.22(84), 131.26(103) |                                                                                                    | MS3[249.40@35-->187.10@40]:<br>228.18(19), 173.12(12),<br>172.10(64), 169.21(13),<br>159.13(1000), 157.17(11),<br>141.15(41), 132.12(14),<br>131.13(195), 128.83(14) | 248.1121      | C <sub>14</sub> H <sub>16</sub> O <sub>4</sub>   | 3.1            |
| 42.46       | MS[Full ms]1126.39(374),<br>1123.25(354), 1056.56(350),<br>722.46(355), 644.92(303),<br>516.26(434), 515.22(1000)                                                              |                                                                                                                | MS2[515.20@35]: 353.10(1000),<br>335.29(60), 191.33(136) |                                                                                                                                                                                                                                                                                         | MS3[515.20@35-->353.10@40]:<br>191.27(1000), 190.53(12),<br>179.21(245), 173.16(11),<br>135.35(40) |                                                                                                                                                                      | 516.1195      | C <sub>25</sub> H <sub>24</sub> O <sub>12</sub>  | 0.6            |
| 47.10       | MS[Full ms]1453.63(325),<br>1344.75(357), 1225.02(314),<br>1129.34(405), 1118.10(329),<br>1029.21(341), 936.42(310),<br>821.28(350), 728.44(335),<br>446.89(301), 317.48(1000) |                                                                                                                |                                                          |                                                                                                                                                                                                                                                                                         |                                                                                                    |                                                                                                                                                                      | 318.1428      | C <sub>15</sub> H <sub>26</sub> O <sub>5</sub> S | 1.5            |

| RT<br>(min) | MS Neg                                                                                                                                                                         | MS Pos                                                                                                         | MS <sup>2</sup> Neg                                                                    | MS <sup>2</sup> Pos                                       | MS <sup>3</sup> Neg                                                                                                                                                    | MS <sup>3</sup> Pos                                                                                                                                                           | MW<br>(HR-MS) | Formula                                                       | Error<br>(ppm)                                 |     |
|-------------|--------------------------------------------------------------------------------------------------------------------------------------------------------------------------------|----------------------------------------------------------------------------------------------------------------|----------------------------------------------------------------------------------------|-----------------------------------------------------------|------------------------------------------------------------------------------------------------------------------------------------------------------------------------|-------------------------------------------------------------------------------------------------------------------------------------------------------------------------------|---------------|---------------------------------------------------------------|------------------------------------------------|-----|
| 48.04       | MS[Full ms]1484.59(514),<br>1461.09(391), 1060.23(415),<br>821.39(362), 683.28(440),<br>553.46(366), 515.08(528),<br>469.48(1000)                                              | MS[Full ms]963.30(159),<br>555.44(266), 493.55(153),<br>472.40(190), 471.41(1000),<br>296.78(261), 122.57(366) | MS2[469.50@35]: 319.28(1000),<br>275.36(109)                                           |                                                           | MS3[469.50@35-->319.30@40]:<br>304.40(32), 276.36(54),<br>275.25(1000), 274.14(46),<br>260.40(20), 192.18(233),<br>177.36(14), 149.19(828),<br>148.53(14), 134.25(115) |                                                                                                                                                                               | 470.1980      | C <sub>25</sub> H <sub>30</sub> O <sub>7</sub> N <sub>2</sub> | 0.6                                            |     |
| 53.78       | MS[Full ms]1455.58(458),<br>1445.64(486), 1264.00(456),<br>1131.70(392), 993.52(365),<br>920.25(381), 722.90(398),<br>378.97(1000), 333.35(429)                                |                                                                                                                | MS2[333.40@35]: 305.26(371),<br>262.18(103), 261.16(1000),<br>203.28(229), 189.32(127) |                                                           | MS3[333.40@35-->261.20@40]:<br>244.35(57), 243.26(467),<br>215.25(19), 203.20(928),<br>202.45(22), 189.24(1000),<br>175.23(22)                                         |                                                                                                                                                                               | 334.1344      | C <sub>18</sub> H <sub>22</sub> O <sub>6</sub>                | 2.8                                            |     |
| 58.48       | MS[Full ms]1380.40(261),<br>1310.76(272), 1301.28(445),<br>1274.11(268), 1191.97(274),<br>1189.66(362), 311.44(1000)                                                           |                                                                                                                | MS2[311.40@35]: 312.36(168),<br>311.37(1000), 293.39(94)                               |                                                           | MS3[311.40@35-->293.40@40]:<br>294.35(77), 293.34(1000),<br>249.32(30), 230.38(11),<br>143.16(11)                                                                      |                                                                                                                                                                               | 312.0959      | C <sub>15</sub> H <sub>20</sub> O <sub>5</sub> S              | 2.0                                            |     |
| 66.10       | MS[Full ms]1481.33(276),<br>1409.25(281), 1319.19(266),<br>1243.45(275), 1078.37(291),<br>860.51(291), 793.47(318),<br>663.56(358), 580.15(376),<br>579.12(1000), 534.60(355), | MS[Full ms]619.42(138),<br>536.57(235), 535.55(1000),<br>328.47(319), 296.99(101),<br>187.38(103), 122.53(260) |                                                                                        | MS2[535.60@35]: 517.22(935),<br>499.34(358), 445.34(1000) |                                                                                                                                                                        | MS3[535.60@35-->445.30@40]:<br>427.22(695), 409.22(314),<br>401.20(462), 399.22(876),<br>385.23(457), 383.14(639),<br>381.23(281), 355.22(1000),<br>339.26(387), 337.16(273), |               | 534.3265                                                      | C <sub>30</sub> H <sub>46</sub> O <sub>8</sub> | 3.1 |



| RT<br>(min) | MS Neg                                                                                                                                                                                          | MS Pos                                                                                                                                       | MS <sup>2</sup> Neg                                                                                                | MS <sup>2</sup> Pos | MS <sup>3</sup> Neg                                                                                                                          | MS <sup>3</sup> Pos                                                   | MW<br>(HR-MS) | Formula                                         | Error<br>(ppm) |
|-------------|-------------------------------------------------------------------------------------------------------------------------------------------------------------------------------------------------|----------------------------------------------------------------------------------------------------------------------------------------------|--------------------------------------------------------------------------------------------------------------------|---------------------|----------------------------------------------------------------------------------------------------------------------------------------------|-----------------------------------------------------------------------|---------------|-------------------------------------------------|----------------|
|             | 533.55(816), 375.47(468),<br>329.52(520)                                                                                                                                                        |                                                                                                                                              |                                                                                                                    |                     |                                                                                                                                              | 329.10(416), 321.17(273),<br>298.23(501), 295.10(270),<br>285.19(276) |               |                                                 |                |
| 66.40       | MS[Full ms]1423.43(193),<br>1157.18(154), 847.29(157),<br>742.94(155), 568.31(188),<br>567.45(719), 521.51(184),<br>329.55(1000), 281.37(271)                                                   | MS[Full ms]1067.42(326),<br>700.74(281), 699.61(1000),<br>429.32(267), 415.35(519),<br>410.25(549), 246.78(264),<br>226.21(484), 122.56(500) | MS2[329.60@35]: 330.38(348),<br>329.40(1000), 311.48(116),<br>293.49(51), 229.42(307),<br>211.43(138), 171.41(108) |                     | MS3[329.60@35-->229.40@40]:<br>229.36(1000), 211.33(524),<br>210.55(61), 209.35(260),<br>183.13(75), 167.46(73),<br>127.24(111), 125.33(195) |                                                                       | 330.2333      | C <sub>18</sub> H <sub>34</sub> O <sub>5</sub>  | 2.6            |
| 68.01       | MS[Full ms]1473.20(328),<br>1417.78(272), 1382.11(304),<br>1196.95(276), 1119.76(305),<br>1064.11(258), 1035.35(260),<br>905.30(324), 822.66(694),<br>821.57(1000), 622.14(253),<br>621.36(602) |                                                                                                                                              | MS2[821.60@35]: 803.50(107),<br>759.61(78), 645.53(98),<br>627.55(67), 351.22(1000)                                |                     | MS3[821.60@35-->351.20@40]:<br>333.15(197), 306.85(66),<br>289.15(482), 193.14(1000),<br>175.11(171), 174.24(256),<br>113.18(358)            |                                                                       | 822.3965      | C <sub>42</sub> H <sub>62</sub> O <sub>16</sub> | 4.4            |

| RT<br>(min) | MS Neg                                                                                                                                                                                                     | MS Pos                                                                                                                           | MS <sup>2</sup> Neg                                      | MS <sup>2</sup> Pos                                                                  | MS <sup>3</sup> Neg                                                                 | MS <sup>3</sup> Pos                                                                                                                | MW<br>(HR-MS) | Formula                                        | Error<br>(ppm) |
|-------------|------------------------------------------------------------------------------------------------------------------------------------------------------------------------------------------------------------|----------------------------------------------------------------------------------------------------------------------------------|----------------------------------------------------------|--------------------------------------------------------------------------------------|-------------------------------------------------------------------------------------|------------------------------------------------------------------------------------------------------------------------------------|---------------|------------------------------------------------|----------------|
| 69.38       | MS[Full ms]550.43(339),<br>549.47(1000), 485.66(220)                                                                                                                                                       | MS[Full ms]1094.56(116),<br>1093.52(208), 776.54(101),<br>589.41(106), 524.79(120),<br>506.44(256), 505.41(1000),<br>313.35(334) |                                                          | MS2[505.40@35]: 487.26(912),<br>469.36(384), 451.41(76),<br>415.38(1000)             |                                                                                     | MS3[505.40@35-->415.40@40]:<br>397.19(1000), 379.29(237),<br>353.22(456), 335.27(122),<br>247.08(139), 205.08(109),<br>199.18(101) | 504.3524      | C <sub>30</sub> H <sub>48</sub> O <sub>6</sub> | 4.6            |
| 70.03       |                                                                                                                                                                                                            | MS[Full ms]505.35(158),<br>477.46(155), 311.40(197),<br>310.41(1000), 208.01(201),<br>166.97(152), 122.44(491)                   |                                                          | MS2[310.40@35]: 212.08(70),<br>211.09(1000), 133.09(93),<br>100.21(57)               |                                                                                     | MS3[310.40@35-->211.10@40]:<br>183.16(20), 150.97(32),<br>134.09(11), 133.08(1000),<br>105.12(21)                                  | 309.2165      | C <sub>21</sub> H <sub>27</sub> ON             | 5.3            |
| 70.33       | MS[Full ms]1432.78(285),<br>1415.47(203), 1260.32(232),<br>1211.35(216), 1152.16(214),<br>976.57(212), 932.90(224),<br>925.49(229), 821.65(204),<br>568.54(290), 567.51(1000),<br>551.54(473), 519.57(244) |                                                                                                                                  | MS2[567.50@35]: 521.42(1000),<br>520.60(59), 463.49(393) |                                                                                      | MS3[567.50@35-->521.40@40]:<br>503.42(75), 463.38(1000),<br>445.43(170), 419.44(64) |                                                                                                                                    | 522.3539      | C <sub>30</sub> H <sub>50</sub> O <sub>7</sub> | 1.5            |
| 71.48       | MS[Full ms]976.51(116),<br>975.61(142), 592.52(402),<br>591.47(1000)                                                                                                                                       | MS[Full ms]1177.46(127),<br>631.64(195), 556.36(101),<br>548.78(212), 547.62(464),<br>530.76(335), 529.65(1000),                 |                                                          | MS2[547.50@35]: 529.20(1000),<br>511.36(184), 487.36(52),<br>469.31(301), 451.40(77) |                                                                                     | MS3[547.50@35-->469.30@40]:<br>451.28(1000), 433.28(90),<br>259.32(40), 214.92(22),<br>212.95(21), 184.82(32),                     | 546.3629      | C <sub>32</sub> H <sub>50</sub> O <sub>7</sub> | 3.8            |

| RT<br>(min) | MS Neg                                                                                             | MS Pos                                                                                                                                                      | MS <sup>2</sup> Neg                                                                   | MS <sup>2</sup> Pos                                                       | MS <sup>3</sup> Neg                                                     | MS <sup>3</sup> Pos                                                                                                                                                                               | MW<br>(HR-MS) | Formula                                        | Error<br>(ppm) |
|-------------|----------------------------------------------------------------------------------------------------|-------------------------------------------------------------------------------------------------------------------------------------------------------------|---------------------------------------------------------------------------------------|---------------------------------------------------------------------------|-------------------------------------------------------------------------|---------------------------------------------------------------------------------------------------------------------------------------------------------------------------------------------------|---------------|------------------------------------------------|----------------|
|             |                                                                                                    | 431.68(202), 334.54(131),<br>163.26(205), 122.55(133)                                                                                                       |                                                                                       |                                                                           |                                                                         | 135.10(21)                                                                                                                                                                                        |               |                                                |                |
| 72.41       | MS[Full ms]1134.56(167),<br>564.99(311), 549.45(347),<br>548.50(325), 547.45(1000),<br>295.38(196) | MS[Full ms]547.40(196),<br>505.63(203), 504.54(326),<br>503.50(1000), 487.42(298),<br>333.64(164), 332.76(365),<br>313.57(202), 296.83(169),<br>122.44(435) |                                                                                       | MS2[503.50@35]: 485.26(1000),<br>467.40(145), 445.34(293),<br>413.34(437) |                                                                         | MS3[503.50@35-->485.30@40]:<br>467.25(1000), 466.39(30),<br>449.33(299), 431.38(27),<br>427.17(24), 413.25(734),<br>411.26(31), 395.28(96),<br>353.16(148), 317.17(29),<br>267.13(21), 199.21(29) | 502.3367      | C <sub>30</sub> H <sub>46</sub> O <sub>6</sub> | 3.7            |
| 74.75       | MS[Full ms]592.42(372),<br>591.41(1000), 545.37(142)                                               | MS[Full ms]548.48(127),<br>547.41(400), 530.63(385),<br>529.56(1000), 487.47(287),<br>354.86(123), 334.50(128),<br>122.51(104)                              |                                                                                       |                                                                           |                                                                         |                                                                                                                                                                                                   | 546.3539      | C <sub>32</sub> H <sub>50</sub> O <sub>7</sub> | 2.6            |
| 77.19       | MS[Full ms]1191.33(260),<br>596.58(350), 595.47(1000)                                              |                                                                                                                                                             | MS2[595.50@35]: 595.38(84),<br>415.28(1000), 315.25(340),<br>279.51(102), 241.34(202) |                                                                           | MS3[595.50@35-->415.30@40]:<br>352.72(42), 279.46(1000),<br>153.22(488) |                                                                                                                                                                                                   | 596.2913      | C <sub>34</sub> H <sub>44</sub> O <sub>9</sub> | -0.1           |
| 77.57       |                                                                                                    | MS[Full ms]488.70(321),<br>487.62(1000)                                                                                                                     |                                                                                       | MS2[487.60@35]: 469.25(889),<br>451.35(393), 397.33(1000)                 |                                                                         | MS3[487.60@35-->397.30@40]:<br>379.22(79), 353.17(1000),<br>335.21(147), 227.16(64),                                                                                                              | 486.3418      | C <sub>30</sub> H <sub>46</sub> O <sub>5</sub> | 4.5            |

| RT<br>(min) | MS Neg                                                                                                                          | MS Pos                                                                            | MS <sup>2</sup> Neg                                                                                   | MS <sup>2</sup> Pos                                                                                                                                                                                  | MS <sup>3</sup> Neg                                                      | MS <sup>3</sup> Pos                                                                                   | MW<br>(HR-MS) | Formula                                        | Error<br>(ppm) |
|-------------|---------------------------------------------------------------------------------------------------------------------------------|-----------------------------------------------------------------------------------|-------------------------------------------------------------------------------------------------------|------------------------------------------------------------------------------------------------------------------------------------------------------------------------------------------------------|--------------------------------------------------------------------------|-------------------------------------------------------------------------------------------------------|---------------|------------------------------------------------|----------------|
|             |                                                                                                                                 |                                                                                   |                                                                                                       |                                                                                                                                                                                                      |                                                                          | 215.07(55), 203.07(109),<br>201.02(157), 187.07(67),<br>174.95(87), 161.10(61),<br>147.10(71)         |               |                                                |                |
| 77.74       | MS[Full ms]1144.31(189),<br>1143.26(284), 572.58(231),<br>571.58(1000)                                                          |                                                                                   | MS2[571.60@35]: 571.41(131),<br>392.29(65), 391.29(1000),<br>315.28(390), 255.55(104),<br>241.38(211) |                                                                                                                                                                                                      | MS3[571.60@35-->391.30@40]:<br>256.64(204), 255.47(1000),<br>153.24(799) |                                                                                                       | 572.2913      | C <sub>32</sub> H <sub>44</sub> O <sub>9</sub> | -1.3           |
| 78.48       | MS[Full ms]1029.46(254),<br>981.55(260), 769.53(312),<br>576.69(582), 575.60(1000),<br>561.54(286), 551.54(444),<br>265.40(478) | MS[Full ms]532.69(306),<br>531.61(1000), 529.63(387),<br>371.73(306), 315.51(280) |                                                                                                       | MS2[531.60@35]: 531.39(81),<br>513.28(71), 512.28(195),<br>471.26(63), 470.29(510),<br>469.42(65), 453.38(103),<br>452.33(1000), 451.38(141),<br>434.37(106), 416.41(241),<br>415.42(54), 414.26(81) |                                                                          | MS3[531.60@35-->452.30@40]:<br>434.31(1000), 433.63(194),<br>382.31(280)                              | 530.3680      | C <sub>32</sub> H <sub>50</sub> O <sub>6</sub> | 2.2            |
| 79.51       | MS[Full ms]961.27(278),<br>926.35(318), 575.55(490),<br>573.55(1000), 559.72(274)                                               | MS[Full ms]529.69(465),<br>469.82(319), 415.72(300),<br>414.62(1000), 315.63(262) |                                                                                                       | MS2[529.70@35]: 511.28(311),<br>469.29(730), 452.34(72),<br>451.37(1000), 433.41(116),<br>415.39(242), 413.40(66)                                                                                    |                                                                          | MS3[529.70@35-->451.40@40]:<br>433.26(1000), 381.29(429),<br>353.20(161), 227.09(215),<br>199.15(247) | 528.3524      | C <sub>32</sub> H <sub>48</sub> O <sub>6</sub> | 4.4            |

| RT<br>(min) | MS Neg                                                                                                          | MS Pos                                               | MS <sup>2</sup> Neg                                                       | MS <sup>2</sup> Pos                                                                                                                                                       | MS <sup>3</sup> Neg                                                                                                                                                                 | MS <sup>3</sup> Pos                                                                                                                                                          | MW<br>(HR-MS) | Formula                                        | Error<br>(ppm) |
|-------------|-----------------------------------------------------------------------------------------------------------------|------------------------------------------------------|---------------------------------------------------------------------------|---------------------------------------------------------------------------------------------------------------------------------------------------------------------------|-------------------------------------------------------------------------------------------------------------------------------------------------------------------------------------|------------------------------------------------------------------------------------------------------------------------------------------------------------------------------|---------------|------------------------------------------------|----------------|
| 80.93       | MS[Full ms]1033.41(230),<br>991.59(163), 977.65(185),<br>976.65(499), 975.69(1000),<br>923.67(216), 535.63(465) | MS[Full ms]474.63(318),<br>473.58(1000), 455.57(152) | MS2[535.60@35]: 490.41(176),<br>489.38(703), 472.46(198),<br>471.43(1000) |                                                                                                                                                                           | MS3[535.60@35-->471.40@40]:<br>453.45(18), 435.54(66),<br>417.45(17), 413.45(70),<br>411.38(11), 395.40(273),<br>377.45(69), 353.30(22),<br>339.43(1000), 338.78(22),<br>311.64(18) |                                                                                                                                                                              | 490.3640      | C <sub>30</sub> H <sub>50</sub> O <sub>5</sub> | 4.1            |
| 81.84       |                                                                                                                 | MS[Full ms]516.79(291),<br>515.73(1000), 452.67(171) |                                                                           | MS2[515.70@35]: 497.21(137),<br>437.29(340), 419.38(223),<br>383.23(419), 381.36(73),<br>365.29(1000), 357.27(144),<br>339.27(532), 219.19(83),<br>205.18(74), 201.28(55) |                                                                                                                                                                                     | MS3[515.70@35-->365.30@40]:<br>347.34(310), 337.02(210),<br>271.29(172), 251.30(184),<br>225.24(153), 215.24(165),<br>213.02(203), 159.23(269),<br>147.20(164), 145.15(1000) | 514.3731      | C <sub>32</sub> H <sub>50</sub> O <sub>5</sub> | 2.9            |
